# Supplementary material for: circNDUFB2 inhibits non-small cell lung cancer progression via destabilizing IGF2BPs and activating anti-tumor immunity
Source: Nat Commun. 2021 Jan 12;12:295. doi: 10.1038/s41467-020-20527-z (PMC7804955; doi:10.1038/s41467-020-20527-z)
Supplement: Supplementary file 1 — Supplementary Information [file 41467_2020_20527_MOESM1_ESM.pdf]

Supplementary Information

*circNDUFB2* inhibits non-small cell lung cancer progression via destabilizing IGF2BPs and activating anti-tumor immunity

Botai Li,<sup>1</sup> Lili Zhu,<sup>1</sup> Chunlai Lu,<sup>1</sup> Liyan Jiang<sup>\*</sup> and Wenxin Qin<sup>\*</sup>

<sup>1</sup>These authors contributed equally

<sup>\*</sup>Corresponding authors

Supplementary Figure 1

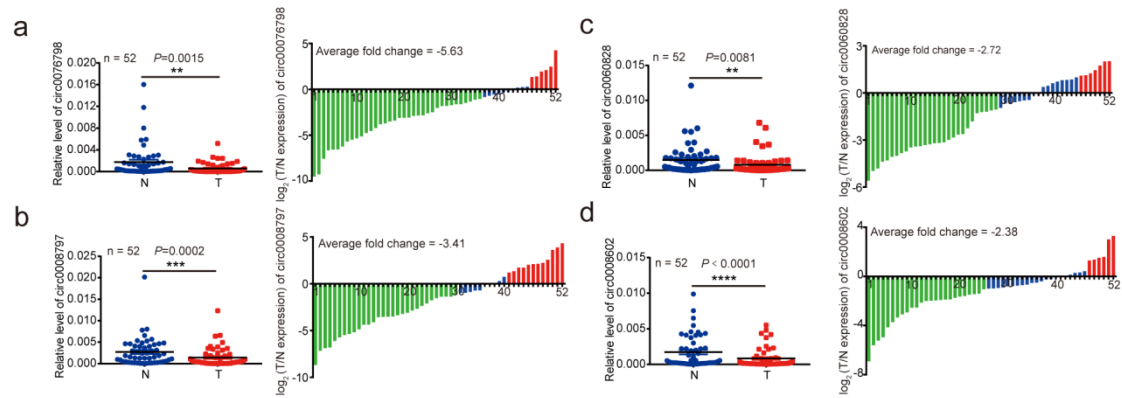

Other four circRNAs remarkably downregulated in NSCLC tissues.

(a-d) Expression levels of the indicated circRNAs in additional 52 paired samples of NSCLC.

*GAPDH* was used as the loading control. n=52 biologically independent paired tissues of NSCLC.

P values are calculated by paired two-sided t-test in a-d.

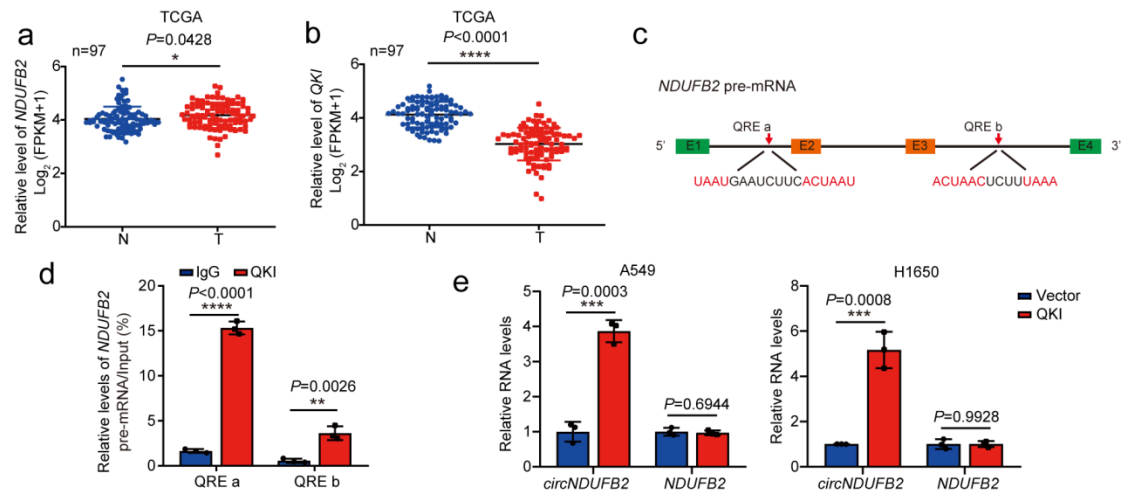

Supplementary Figure 2

QKI promotes *circNDUFB2* formation in NSCLC.

(a-b) mRNA levels of *NDUFB2* (a) and *QKI* (b) for patients with NSCLC in TCGA cohorts. Data are presented as mean  $\pm$  s.d. P values are calculated by paired two-sided t-test in a-b. n=97 biologically independent paired tissues of NSCLC. (c) A sketch map for potential QRE in the *NDUFB2* pre-mRNA. QRE a and QRE b, two potential QKI response elements in the introns flanking exon 2 and exon 3 of *NDUFB2* pre-mRNA, respectively. (d) Analysis for the *NDUFB2* pre-mRNA enrichment, relative to input. RIP assay was performed using QKI antibody in A549 cells. n=3 biologically independent samples. (e) Expression levels of *circNDUFB2* and *NDUFB2* in A549 and H1650 cells with QKI overexpression. n=3 biologically independent samples. Data are presented as mean  $\pm$  s.d. P values are calculated by unpaired two-sided t-test in d-e.

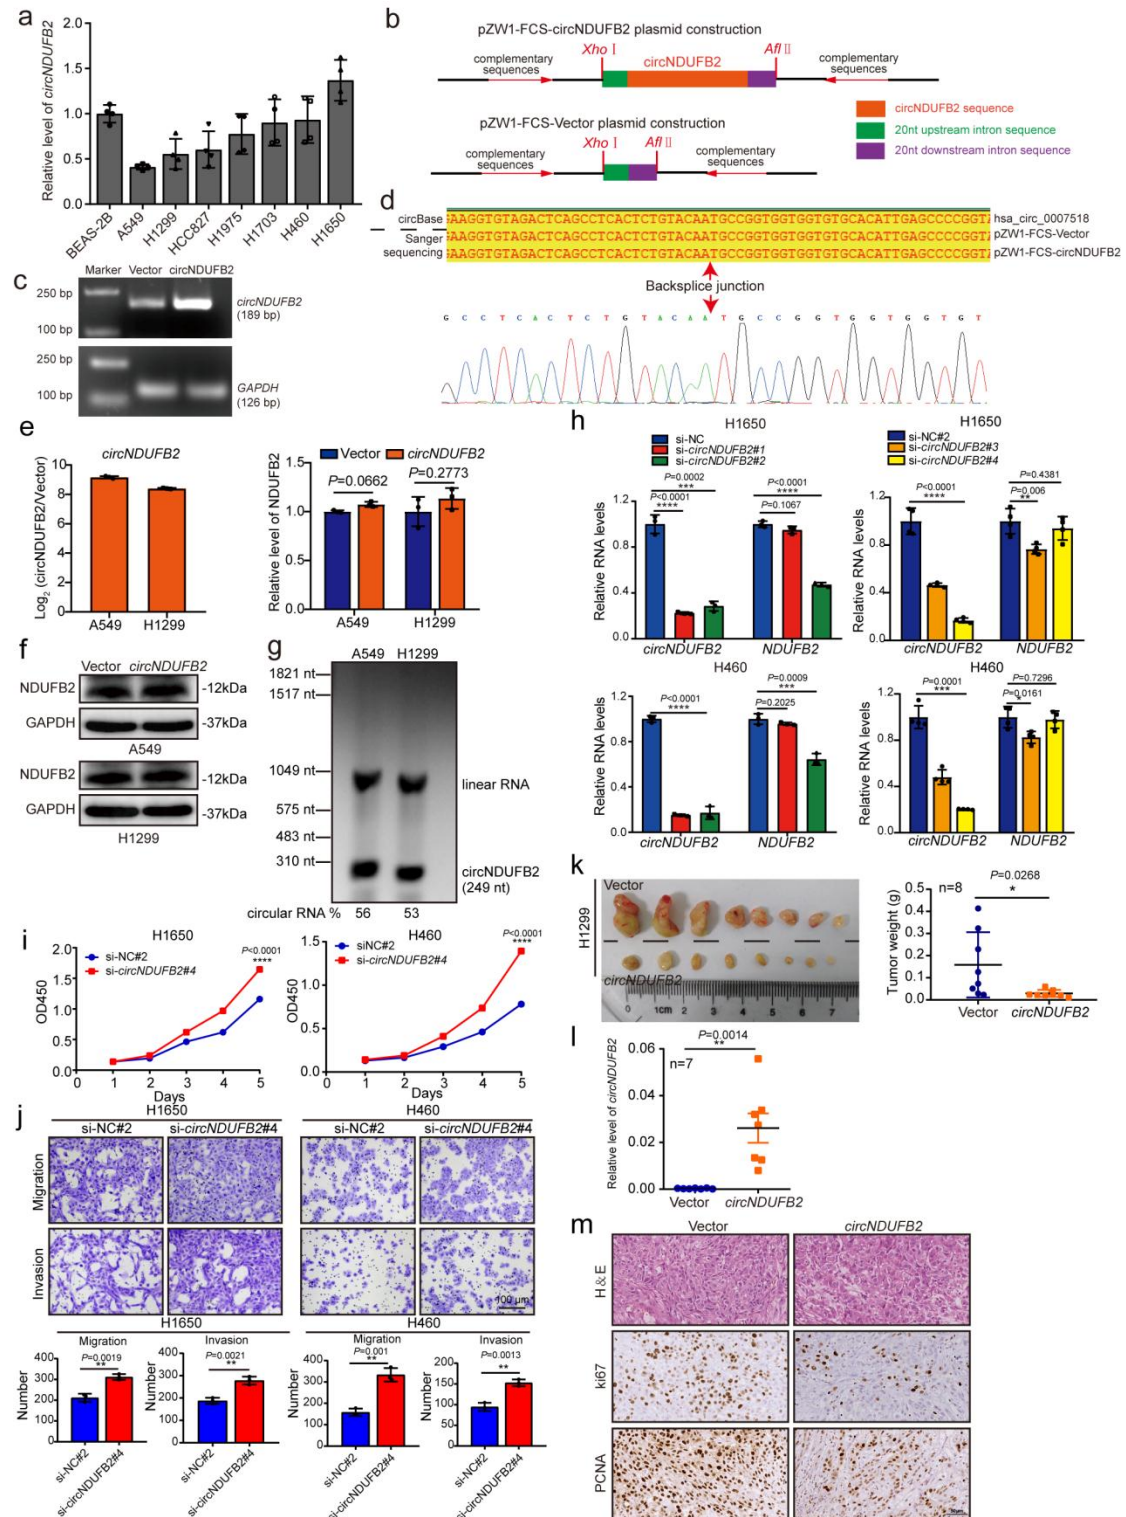

Supplementary Figure 3

Inhibitory effects of *circNDUFB2* on proliferation for NSCLC cells.

(a) Expression levels of *circNDUFB2* in one normal cell line (a human bronchial epithelial cell line BEAS-2B) and seven NSCLC cell lines, relative to BEAS-2B. n=4 biologically independent

samples. (b) A sketch map for plasmid construction of *circNDUFB2* overexpression. (c) PCR analysis for *circNDUFB2* in A549 cells with or without *circNDUFB2* overexpression. (d) Sanger sequencing analysis for PCR products in (c). (e) Expression levels of *circNDUFB2* and *NDUFB2* in NSCLC cells with *circNDUFB2* overexpression. n=3 biologically independent samples. (f) Protein levels of *NDUFB2* in NSCLC cells with *circNDUFB2* overexpression. (g) Northern blotting analysis for RNA from A549 cells and H1299 cells transfected with *circNDUFB2* overexpression plasmid. The relative abundance of circular RNA and linear RNA was determined by using the ImageJ program. (h) Expression levels of *circNDUFB2* and *NDUFB2* in NSCLC cells with *circNDUFB2* knockdown. n=3, 3, 4, 4 biologically independent samples, respectively. (i) Cell proliferation assays for NSCLC cells with *circNDUFB2* knockdown. n=5 biologically independent samples. (j) Migration and invasion assays for NSCLC cells with *circNDUFB2* knockdown. n=3 biologically independent samples. Scale bar=100  $\mu$ m. (k) The weight of subcutaneous xenograft tumors (n=8 mice per group). (l) Expression levels of *circNDUFB2* in subcutaneous xenograft tumors derived from A549 cells. (m) H&E staining and immunohistochemical staining for cell proliferation marker in subcutaneous xenograft tumors derived from A549 cells, scale bar=50  $\mu$ m. Data are presented as mean  $\pm$  s.d. P values are calculated by unpaired two-sided t-test in a, e and h-l. Two independent experiments were carried out with similar results in c, f-g and m.



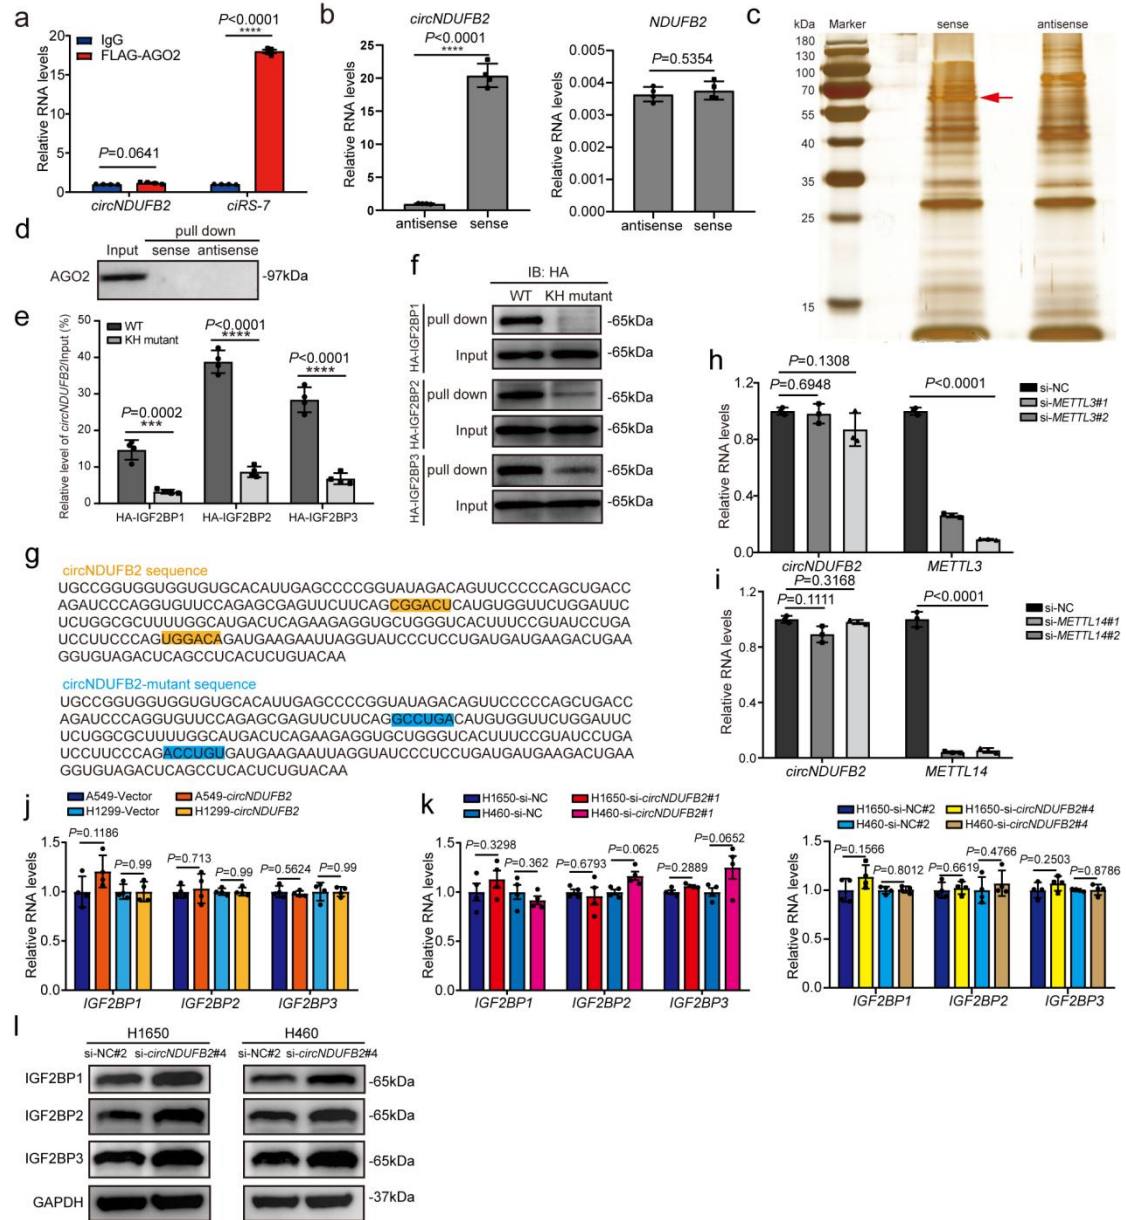

Supplementary Figure 5

*circNDUFB2* binds with IGF2BPs.

(a) Analysis for *circNDUFB2* and *ciRS-7* enrichment, relative to IgG. RIP assays were performed using FLAG antibody in A549 cells transfected with FLAG-AGO2 plasmid. n=4 biologically independent samples. (b) Analysis for *NDUFB2* and *circNDUFB2* enrichment. RNA pull down assays were performed using biotinylated sense probe which targets the *circNDUFB2* backsplice junction region. n=4 biologically independent samples. (c) Biotinylated sense probe and antisense

probe were incubated with A549 total cell lysates for RNA pull down assays. After silver staining, the sense-specific band at about 65kDa (red arrow) was excised and analysed using mass spectrometry. (d) RNA pull down showed that *circNDUFB2* didn't interact with AGO2. (e) Analysis for the *circNDUFB2* enrichment, relative to input. RIP assay was performed using HA antibody in the indicated cells. n=4 biologically independent samples. (f) Binding of *circNDUFB2* to IGF2BPs or KH domain mutant IGF2BPs in vitro. (g) Sequences of *circNDUFB2* and *circNDUFB2*-mutant. For the *circNDUFB2*-mutant plasmid, 'CGGACU' was replaced with 'GCCUGA', and 'UGGACA' was replaced with 'ACCUGU', respectively. (h) Expression levels of *METTL3* and *circNDUFB2* in A549 cells with *METTL3* knockdown. n=3 biologically independent samples. (i) Expression levels of *METTL14* and *circNDUFB2* in A549 cells with *METTL14* knockdown. n=3 biologically independent samples. (j-k) mRNA levels of *IGF2BPs* in NSCLC cells with *circNDUFB2* overexpression (j) or knockdown (k). n=4 biologically independent samples. (l) Protein levels of IGF2BPs in NSCLC cells with *circNDUFB2* knockdown. Data are presented as mean  $\pm$  s.d. P values are calculated by unpaired two-sided t-test in a-b, e and h-k. Two independent experiments were carried out with similar results in c-d, f and l.

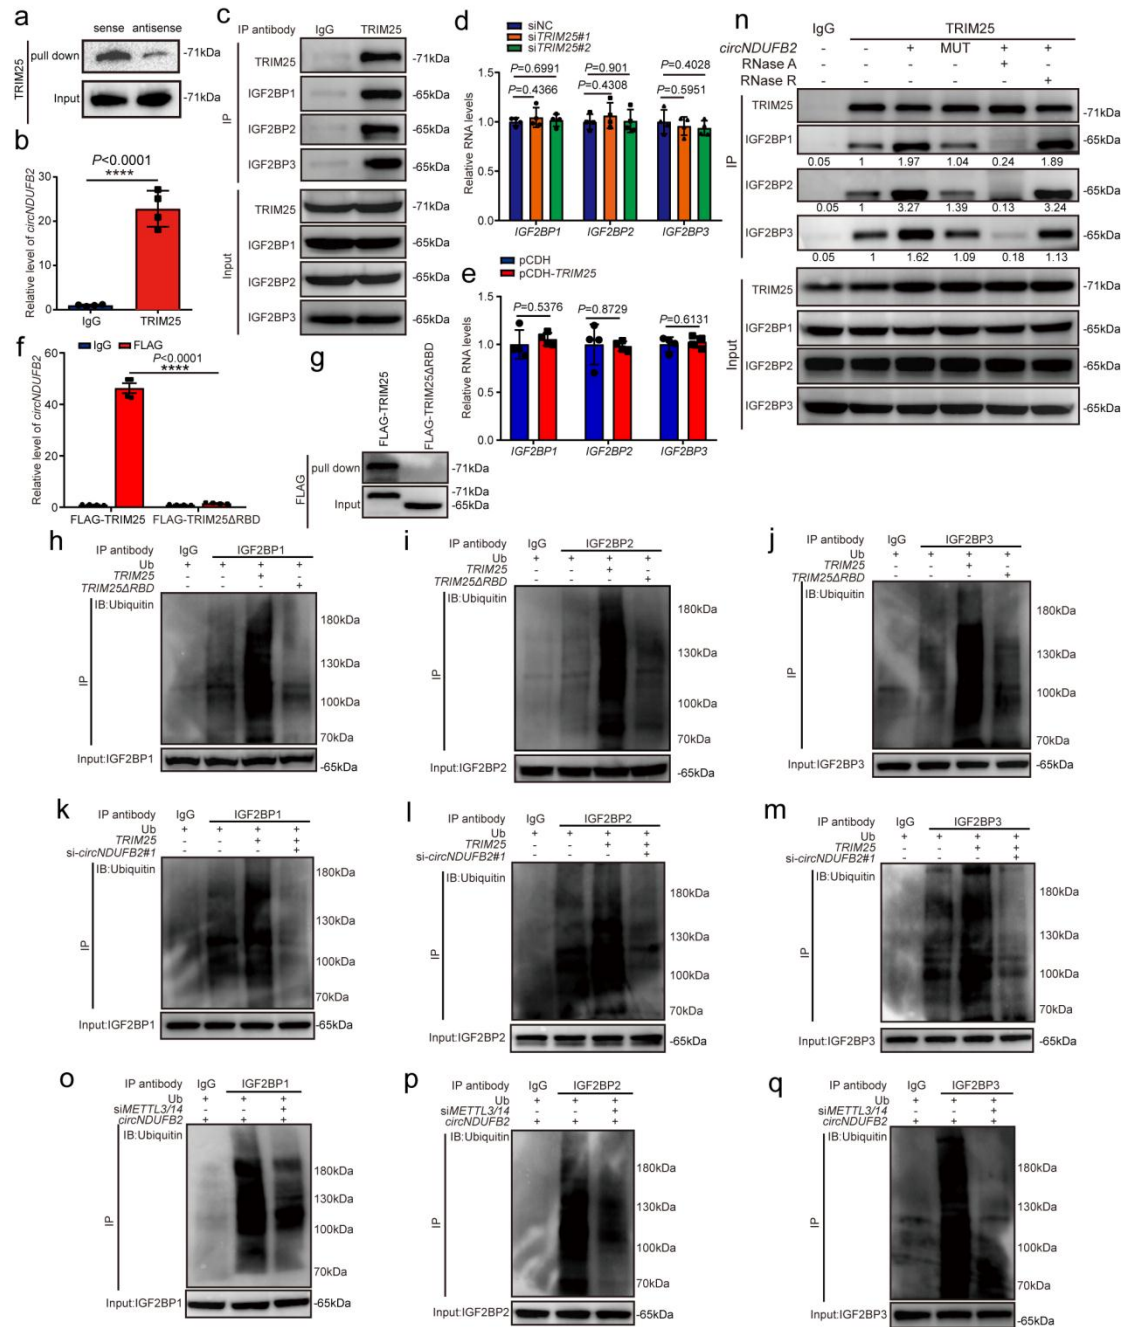

Supplementary Figure 6

TRIM25 promotes ubiquitination and degradation of IGF2BPs in a *circNDUFB2*-dependent manner.

(a) Binding of *circNDUFB2* with TRIM25 in H1299 cells. (b) Analysis for *circNDUFB2*

enrichment, relative to IgG. RIP assay was performed using TRIM25 antibody in A549 cells. n=4

biologically independent samples. (c) Co-immunoprecipitation (Co-IP) showed the binding of

TRIM25 with IGF2BPs in A549 cells. (d-e) mRNA levels of *IGF2BPs* in A549 cells with TRIM25 knockdown (d) or overexpression (e), respectively. n=4 biologically independent samples. (f) Analysis for *circNDUFB2* enrichment, relative to IgG. RIP assays were performed using FLAG antibody in A549 cells. n=4 biologically independent samples. (g) RNA pull down assays were performed using biotinylated sense probe for *circNDUFB2* in A549 cells. (h-j) Ubiquitination modification of IGF2BPs in A549 cells transfected with FLAG-TRIM25 or FLAG-TRIM25 $\Delta$ RBD plasmids. (k-m) Ubiquitination modification of IGF2BPs in A549 cells with TRIM25 overexpression and *circNDUFB2* knockdown. (n) Co-IP showed the binding of TRIM25 with IGF2BP proteins. (o-q) Ubiquitination modification of IGF2BPs in A549 cells with METTL3/14 knockdown. Ub, ubiquitin. Data are presented as mean  $\pm$  s.d. P values are calculated by unpaired two-sided t-test in b and d-f. Two independent experiments were carried out with similar results in a, c, g and h-q.

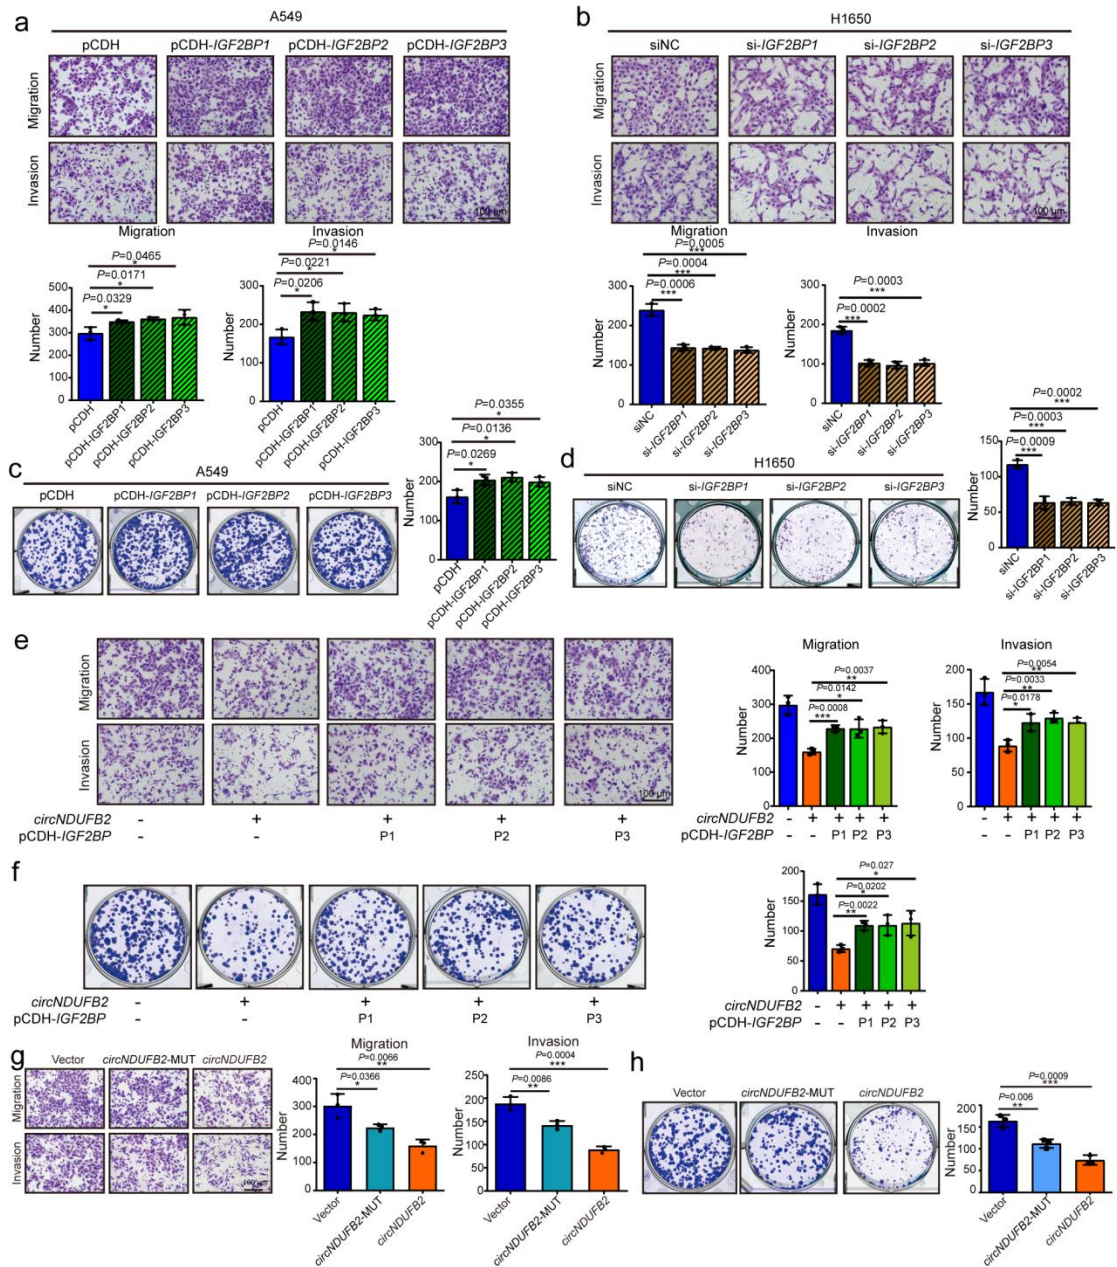

Supplementary Figure 7

IGF2BPs mediate inhibitory effects of *circNDUFB2* on NSCLC progression.

(a-b) Migration and invasion assays for NSCLC cells with IGF2BPs overexpression or knockdown. n=3 biologically independent samples. Scale bar=100  $\mu$ m. (c-d) Colony formation assays for NSCLC cells with IGF2BPs overexpression or knockdown. n=3 biologically independent samples. (e) Migration and invasion assays showed the restoring effects of IGF2BPs on A549 cells with *circNDUFB2* overexpression. P1, IGF2BP1; P2, IGF2BP2; P3, IGF2BP3. n=3

biologically independent samples. Scale bar=100  $\mu$ m. (f) Colony formation assays showed the restoring effects of IGF2BPs on A549 cells with *circNDUFB2* overexpression. P1, IGF2BP1; P2, IGF2BP2; P3, IGF2BP3. n=3 biologically independent samples. (g) Migration and invasion assays for A549 cells with overexpression of *circNDUFB2* or *circNDUFB2*-mutant. n=3 biologically independent samples. Scale bar=100  $\mu$ m. (h) Colony formation assays for A549 cells with overexpression of *circNDUFB2* or *circNDUFB2*-mutant. n=3 biologically independent samples. Data are presented as mean  $\pm$  s.d. P values are calculated by unpaired two-sided t-test in a-h. Two independent experiments were carried out with similar results in a, b, e and g.

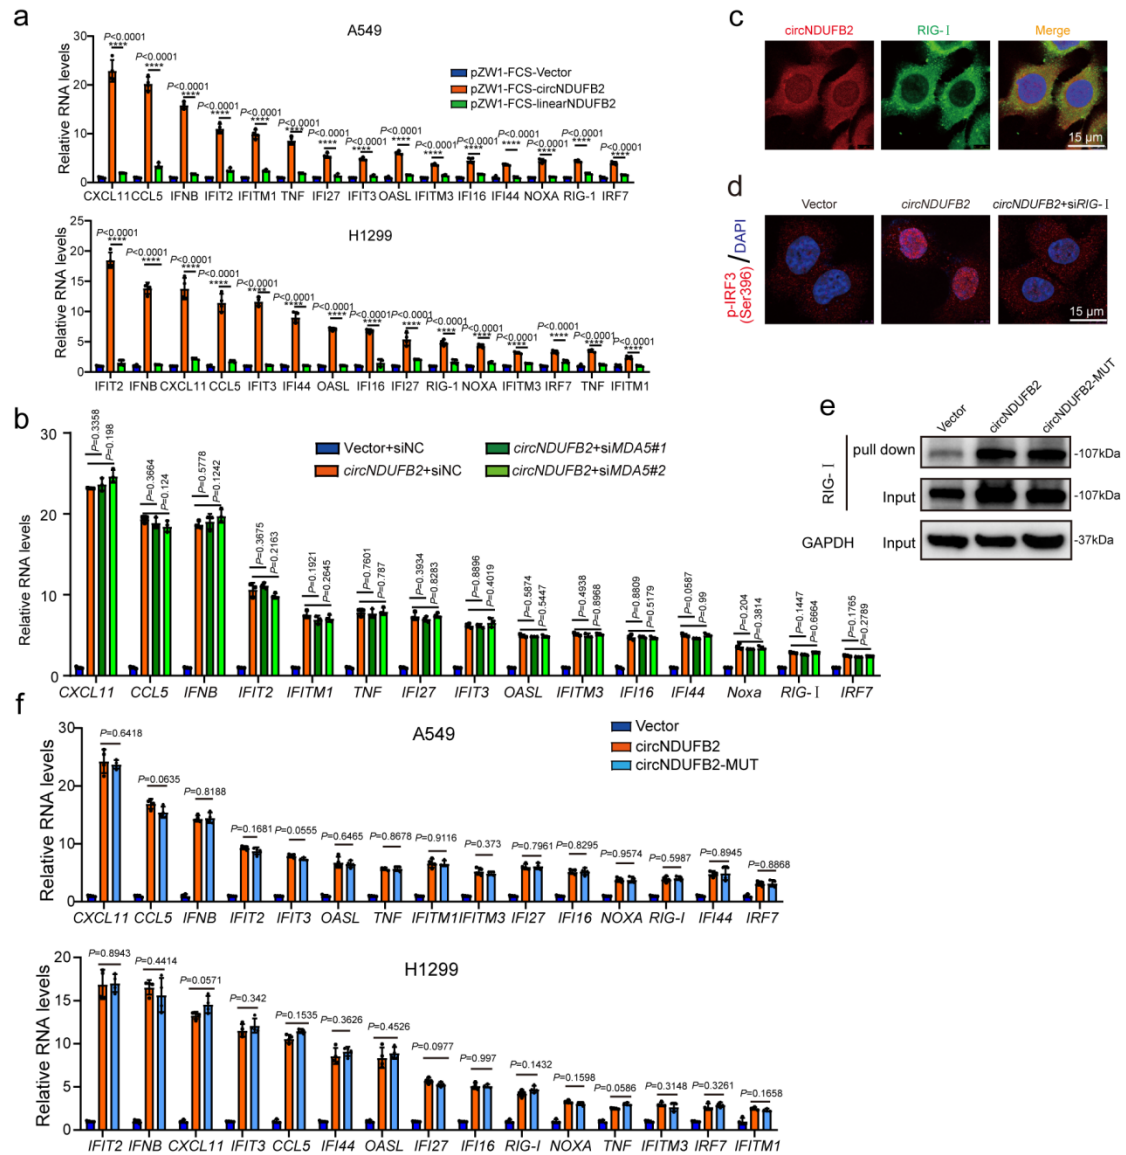

Supplementary Figure 8

*circNDUFB2* binds with RIG-I.

(a) Expression levels of indicated mRNA in NSCLC cells with *circNDUFB2* or linear-*NDUFB2* overexpression. n=4 biologically independent samples. (b) Fold change of indicated mRNAs in A549 cells with or without MDA5 knockdown. n=3 biologically independent samples. (c) RNA FISH-immunofluorescence showed the co-localization of *circNDUFB2* (red) with RIG-I (green) in A549 cells. Scale bar=15  $\mu$ m. (d) Immunofluorescence detected the localization of p-IRF3 in A549 cells. Scale bar=15  $\mu$ m. (e) RNA pull down assay was performed using biotinylated sense

probe for *circNDUFB2* in A549 cells with *circNDUFB2* or *circNDUFB2*-MUT overexpression. (f)

Expression levels of indicated mRNAs in NSCLC cells with *circNDUFB2* or *circNDUFB2* mutant overexpression. n=4 biologically independent samples. Data are presented as mean  $\pm$  s.d. P values are calculated by unpaired two-sided t-test in a-b and f. Two independent experiments were carried out with similar results in c-e.

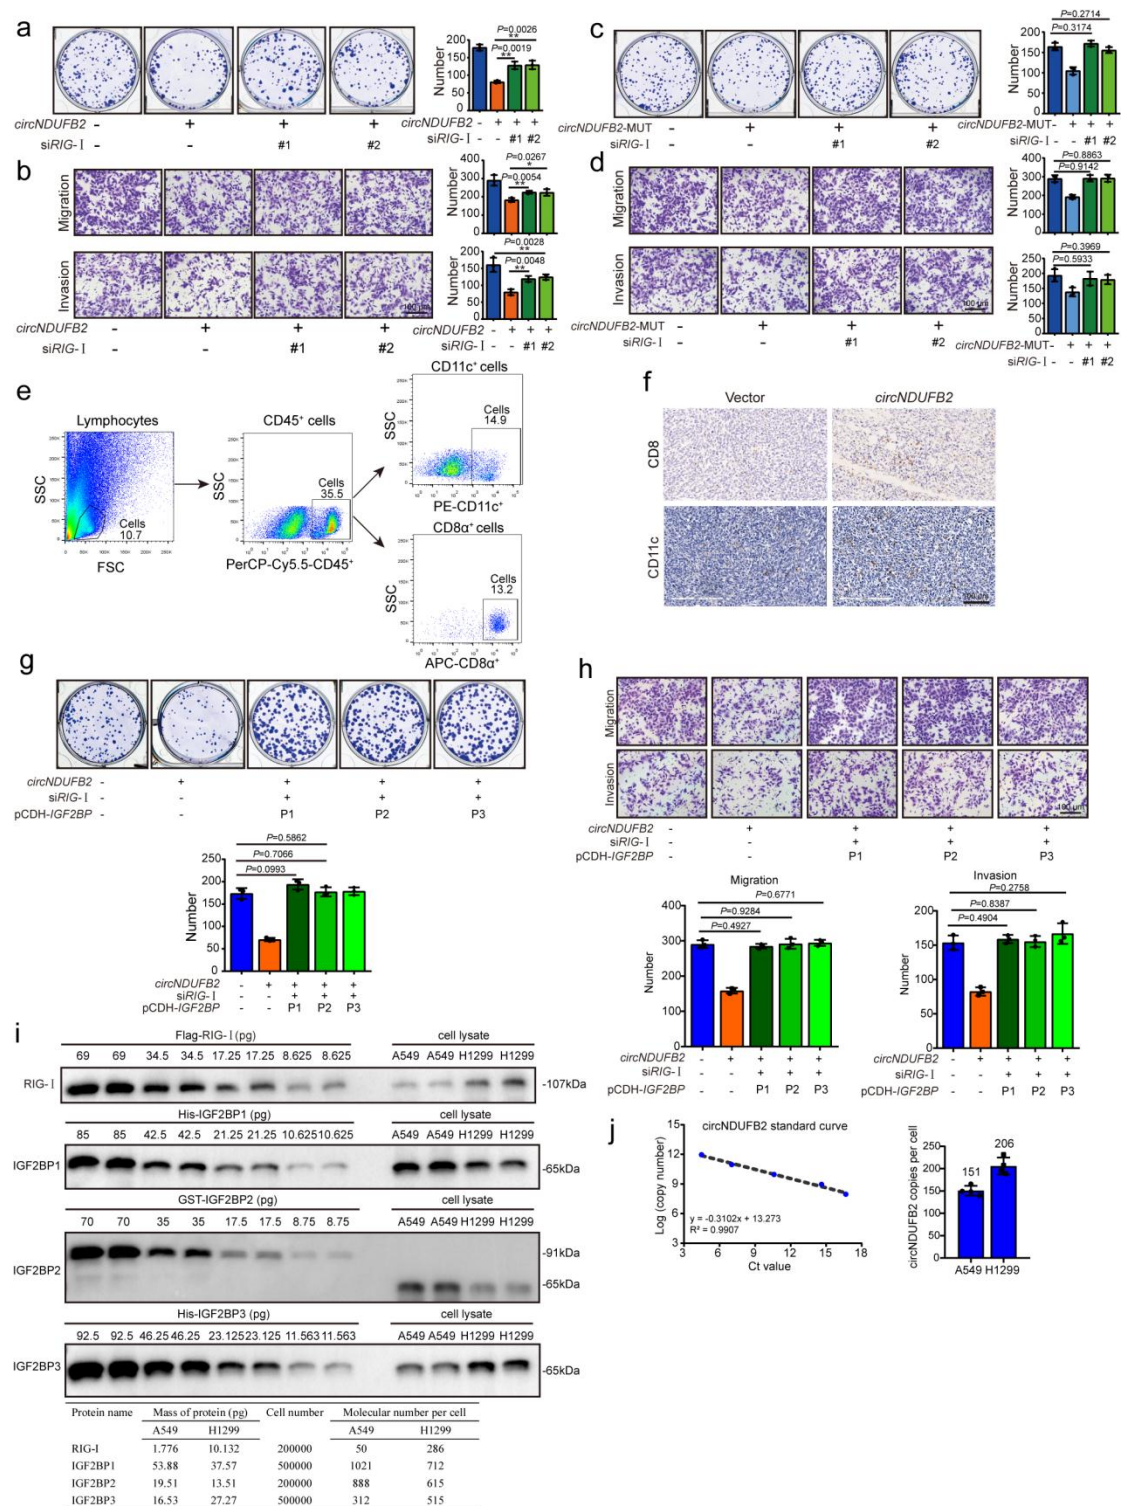

Supplementary Figure 9

Immune responses of *circNDUFB2* mediated by RIG-I inhibits tumor progression.

(a-b) Colony formation assays and migration assays showed the restoring effects of RIG-I on

A549 cells with *circNDUFB2* overexpression. n=3 biologically independent samples. Scale

bar=100  $\mu$ m. (c-d) Colony formation assays and migration assays showed the restoring effects of RIG-I on A549 cells with *circNDUFB2*-MUT overexpression. n=3 biologically independent samples. Scale bar=100  $\mu$ m. (e) Gating strategy and representative flow cytometry plots for the assessment of CD45<sup>+</sup>, CD8 $\alpha$ <sup>+</sup> and CD11c<sup>+</sup> cells in *circNDUFB2* overexpression and control LLC1 tumors. (f) IHC staining for CD8 and CD11c in subcutaneous xenograft tumors, scale bar=100  $\mu$ m. (g-h) Colony formation assays and migration assays showed the restoring effects of IGF2BPs and RIG-I on A549 cells with *circNDUFB2* overexpression. n=3 biologically independent samples. Scale bar=100  $\mu$ m. (i) Measurement of protein molecular number per cell. Top: western blot analysis for purified recombinant protein and cell lysate corresponding to a known number of NSCLC cells. Bottom: quantification summarized in table. Two independent experiments were carried out with similar results. (j) Copy number of *circNDUFB2* in A549 cells and H1299 cells. Left: the linear relationship between the log *circNDUFB2* copy number and its Ct value by qRT-PCR. Right: the average *circNDUFB2* copies per A549 cell and H1299 cell. n=4 biologically independent samples. P1, IGF2BP1; P2, IGF2BP2; P3, IGF2BP3; Data are presented as mean  $\pm$  s.d. P values are calculated by unpaired two-sided t-test in a-d, g-h and j.

Supplementary Table 1

Associations between *circNDUFB2* and clinicopathologic features in 52 patients with NSCLC

| Clinicopathological features | Number of patients | <i>circNDUFB2</i> |      | P value             |
|------------------------------|--------------------|-------------------|------|---------------------|
|                              |                    | Low               | High |                     |
| Age (y)                      |                    |                   |      | 0.1259              |
| <60                          | 15                 | 5                 | 10   |                     |
| ≥60                          | 37                 | 21                | 16   |                     |
| Gender                       |                    |                   |      | 0.0922              |
| Male                         | 30                 | 18                | 12   |                     |
| Female                       | 22                 | 8                 | 14   |                     |
| Smoke                        |                    |                   |      | 0.0714              |
| Smoker                       | 16                 | 11                | 5    |                     |
| Nonsmoker                    | 36                 | 15                | 21   |                     |
| Tumor size (cm)              |                    |                   |      | 0.0337 <sup>a</sup> |
| <3                           | 16                 | 4                 | 12   |                     |
| ≥3                           | 36                 | 22                | 14   |                     |
| Lymph node metastasis        |                    |                   |      | 0.0226 <sup>a</sup> |
| No                           | 20                 | 6                 | 14   |                     |
| Yes                          | 32                 | 20                | 12   |                     |
| Stage                        |                    |                   |      | 0.011 <sup>a</sup>  |
| I + II                       | 31                 | 11                | 20   |                     |
| III+IV                       | 21                 | 15                | 6    |                     |

The associations between *circNDUFB2* and clinicopathologic features in patients with NSCLC were analyzed. NSCLC, non-small cell lung cancer. The median expression level was used as the cutoff.

<sup>a</sup>P<0.05, which was considered as a significant difference.

Supplementary Table 2

Clinicopathological characteristics of 55 NSCLC patients used in this study

| Cases used for Arraystar Human circRNAs Array analysis (n=3) |     |        |       |                 |                       |       |
|--------------------------------------------------------------|-----|--------|-------|-----------------|-----------------------|-------|
| Case                                                         | Age | Gender | Smoke | Tumor Size (cm) | Lymph node metastasis | Stage |
| 1                                                            | 64  | Male   | YES   | 3.5*2.5*3       | YES                   | I B   |
| 2                                                            | 56  | Female | NO    | 3.5*3*2.5       | YES                   | II A  |
| 3                                                            | 53  | female | NO    | 4*3*2.5         | YES                   | III A |

  

| Cases used for qRT-PCR validation (n=52) |                         |                   |                           |                                      |                            |  |
|------------------------------------------|-------------------------|-------------------|---------------------------|--------------------------------------|----------------------------|--|
| Age<br>(<60:≥60)                         | Gender<br>(Male:Female) | Smoke<br>(NO:YES) | Tumor size, cm<br>(<3:≥3) | Lymph node<br>metastasis<br>(NO:YES) | Stage<br>( I + II :III+IV) |  |
| 15:37                                    | 30:22                   | 36:16             | 14:38                     | 19:33                                | 31:21                      |  |

Supplementary Table 3

Mass spectrometry identification of proteins pulled down at about 65kDa

| Gene name       | Protein_score | Protein_coverage | MW [kDa] |
|-----------------|---------------|------------------|----------|
| <i>IGF2BP2</i>  | 566           | 23.2             | 66.2     |
| <i>IGF2BP1</i>  | 211           | 14.7             | 63.8     |
| <i>IGF2BP3</i>  | 175           | 10.5             | 64       |
| <i>COIL</i>     | 142           | 12.7             | 63.3     |
| <i>HNRNPLL</i>  | 118           | 10.7             | 60.9     |
| <i>NOP56</i>    | 87            | 6.2              | 66.4     |
| <i>CLK2</i>     | 75            | 6                | 60.5     |
| <i>KPNA1</i>    | 46            | 3.2              | 60.9     |
| <i>STAU1</i>    | 40            | 2.9              | 63.4     |
| <i>PUF60</i>    | 35            | 1.8              | 60       |
| <i>CSTF2</i>    | 34            | 1                | 61       |
| <i>DDX56</i>    | 32            | 0.9              | 62       |
| <i>HIRIP3</i>   | 32            | 0.9              | 62.3     |
| <i>KPNA6</i>    | 30            | 3                | 60.7     |
| <i>CSRNP1</i>   | 30            | 4.1              | 64.8     |
| <i>INSM2</i>    | 26            | 0.9              | 60.5     |
| <i>TCP1</i>     | 26            | 1.8              | 60.8     |
| <i>DDX28</i>    | 25            | 1.7              | 59.8     |
| <i>UGT1A7</i>   | 25            | 0.9              | 60.6     |
| <i>RELA</i>     | 24            | 1.1              | 60.7     |
| <i>CRMP1</i>    | 24            | 0.9              | 62.5     |
| <i>CCDC102A</i> | 24            | 1.1              | 62.8     |
| <i>CPNE3</i>    | 23            | 1.7              | 60.9     |
| <i>ZNF18</i>    | 23            | 1.3              | 63.2     |
| <i>TMEM200C</i> | 23            | 1                | 64.3     |
| <i>PANK2</i>    | 21            | 0.9              | 63.3     |

Supplementary Table 4  
Antibodies used in this study

| Antibodies                                                                       | Source                    | Identifier     |
|----------------------------------------------------------------------------------|---------------------------|----------------|
| Anti-AGO2                                                                        | Abcam                     | Cat#ab186733   |
| Anti-CD8                                                                         | Abcam                     | Cat#ab22378    |
| Anti-IFN $\beta$                                                                 | Abcam                     | Cat#ab176343   |
| Anti-ki67                                                                        | Abcam                     | Cat#ab16667    |
| Anti-PANA                                                                        | Abcam                     | Cat#ab29       |
| Anti-TRIM25                                                                      | Abcam                     | Cat#ab88669    |
| Anti-GAPDH                                                                       | Proteintech               | Cat#60004-1-Ig |
| Anti-HA                                                                          | Proteintech               | Cat#51064-2-AP |
| Anti-HECTD3                                                                      | Proteintech               | Cat#11487-1-AP |
| Anti-IGF2BP1                                                                     | Proteintech               | Cat#22803-1-AP |
| Anti-IGF2BP2                                                                     | Proteintech               | Cat#11601-1-AP |
| Anti-IGF2BP3                                                                     | Proteintech               | Cat#14642-1-AP |
| Anti-IRF3                                                                        | Proteintech               | Cat#11312-1-AP |
| Anti-IRF7                                                                        | Proteintech               | Cat#22392-1-AP |
| Anti-NDUFB2                                                                      | Proteintech               | Cat#17614-1-AP |
| Anti-RIG-I                                                                       | Proteintech               | Cat#20566-1-AP |
| Anti-TNF                                                                         | Proteintech               | Cat#60291-1-Ig |
| Anti-TRIM25                                                                      | Proteintech               | Cat#12573-1-AP |
| Anti-Ubiquitin                                                                   | Proteintech               | Cat#10201-2-AP |
| Anti-CD11C                                                                       | Cell Signaling Technology | Cat#97585      |
| Anti-P65                                                                         | Cell Signaling Technology | Cat#8242       |
| Anti-p-P65 (Ser536)                                                              | Cell Signaling Technology | Cat#3033       |
| Anti-p-IRF3 (Ser396)                                                             | Cell Signaling Technology | Cat#29047      |
| Anti-p-STAT1 (Tyr701)                                                            | Cell Signaling Technology | Cat#9167       |
| Anti-p-STAT2 (Tyr690)                                                            | Cell Signaling Technology | Cat #88410     |
| Anti-rabbit IgG (H+L), F(ab') <sub>2</sub> Fragment (Alexa Fluor® 488 Conjugate) | Cell Signaling Technology | Cat#4412       |
| Anti-rabbit IgG (H+L), F(ab') <sub>2</sub> Fragment (Alexa Fluor® 594 Conjugate) | Cell Signaling Technology | Cat#8889       |
| Anti-mouse IgG (H+L), F(ab') <sub>2</sub> Fragment (Alexa Fluor® 488 Conjugate)  | Cell Signaling Technology | Cat#4408       |
| Anti-CD8 $\alpha$                                                                | Biolegend                 | Cat#100712     |
| Anti-CD11C                                                                       | Biolegend                 | Cat#117308     |
| Anti-CD45                                                                        | Invitrogen                | Cat#45-0451-82 |
| Anti-QKI                                                                         | BETHYL                    | Cat#A300-183A  |
| Anti-Flag                                                                        | Sigma                     | Cat#F1804      |
| Anti-rabbit-IgG-HRP                                                              | Bioworld                  | Cat#BS13278    |
| Anti-mouse-IgG-HRP                                                               | Bioworld                  | Cat#BS12478    |
